# Supplementary figures and images for: Mortality and loss-to-follow-up during the pre-treatment period in an antiretroviral therapy programme under normal health service conditions in Uganda
Source: Springer Nature journal article supplement (doi:10.1186/1471-2458-9-290), 2009-08-11

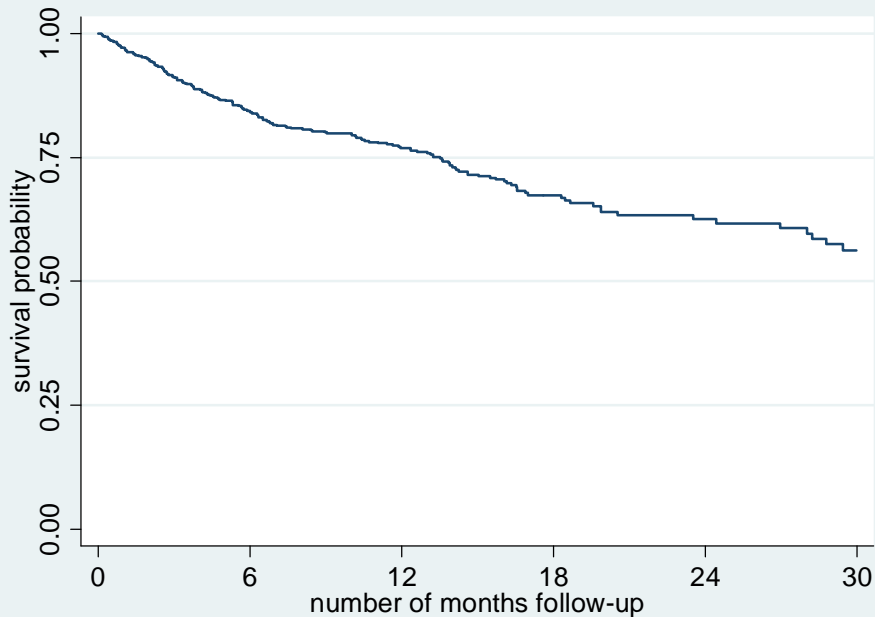

Number at risk

637

483

308

138

80

41

Supplement: 12889_2009_1693_MOESM1_ESM.pdf [file 12889_2009_1693_MOESM1_ESM.pdf]
